1 **Allele-specific antisense oligonucleotide therapy for dominantly**  
2 **inherited hearing impairment DFNA9.**

3 Erik de Vrieze<sup>1,2</sup>, Jolien Peijnenborg<sup>1</sup>, Jorge Cañas Martin<sup>1</sup>, Aniek Martens<sup>1</sup>, Jaap Oostrik<sup>1,2</sup>,  
4 Simone van der Heuvel<sup>3</sup>, Kornelia Neveling<sup>3,4</sup>, Ronald Pennings<sup>1,2</sup>, Hannie Kremer<sup>1,2,3</sup>, Erwin  
5 van Wijk<sup>1,2</sup>

6  
7 <sup>1</sup>Department of Otorhinolaryngology, Radboud University Medical Center, Nijmegen, the  
8 Netherlands. <sup>2</sup>Donders Institute for Brain, Cognition and Behaviour, Radboud University  
9 Medical Center, Nijmegen, the Netherlands. <sup>3</sup>Department of Human Genetics, Radboud  
10 University Medical Center, Nijmegen, the Netherlands. <sup>4</sup>Radboud Institute for Health  
11 Sciences, Radboud University Medical Center, Nijmegen, the Netherlands

12

13 Correspondence should be addressed to E.d.V. ([erik.devrieze@radboudumc.nl](mailto:erik.devrieze@radboudumc.nl))

14

15 Experiments were conducted at the Radboud University Medical Center in Nijmegen, the  
16 Netherlands.

17

18 *Corresponding authors address:*

19 Radboud University Medical Center

20 Dept of Otorhinolaryngology and Dept of Human Genetics

21 P.O. box 9101, 6500 HB Nijmegen (route 855)

22 E: [erik.devrieze@radboudumc.nl](mailto:erik.devrieze@radboudumc.nl)

23 T: +31 2436 68901

24

25 *Short title:* Allele-specific AON therapy for DFNA9

26

27 **Abstract**

28 The c.151C>T founder mutation in *COCH* is a frequent cause of late onset, dominantly  
29 inherited hearing impairment and vestibular dysfunction (DFNA9) in the Dutch/Belgian  
30 population. The initial clinical symptoms only manifest between the 3rd and 5th decade of  
31 life, which leaves ample time for therapeutic intervention. The dominant inheritance pattern  
32 and established non-haploinsufficiency disease mechanism indicate that suppressing  
33 translation of mutant *COCH* transcripts has high therapeutic potential. Single-Molecule Real-  
34 Time (SMRT) sequencing resulted in the identification of 11 variants with a low population-  
35 frequency (< 10%), that are specific to the c.151C>T mutant *COCH* allele. Proof of concept  
36 was obtained that gapmer antisense oligonucleotides (AONs), directed against the c.151C>T  
37 mutation or mutant allele-specific intronic variants, are able to specifically induce mutant  
38 *COCH* transcript degradation when delivered to transgenic cells expressing *COCH*  
39 minigenes. Sequence optimization of the AONs against the c.151C>T mutation resulted in a  
40 lead molecule that reduced the levels of mutant *COCH* transcripts by ~60% in a transgenic  
41 cell model, without affecting wildtype *COCH* transcript levels. With the proven safety of AONs  
42 in humans, and rapid advancements in inner ear drug delivery, our in-vitro studies indicate  
43 that AONs offer a promising treatment modality for DFNA9.

44

## 45 **Introduction**

46 DFNA9, caused by mutations in the *COCH* gene, is a relatively common form of dominantly  
47 inherited highly progressive hearing loss and vestibular dysfunction. It is characterized by  
48 adult-onset hearing loss, leading to complete deafness by the age of 50-70 years <sup>1,2</sup>. With  
49 progression of the disease, speech perception and conversation become severely limited.  
50 DFNA9 patients furthermore suffer from balance problems, which severely hamper their daily  
51 activities. Overall, the problems associated with DFNA9 have a severe impact on the quality  
52 of life of patients, their relatives and friends <sup>3</sup>.

53 The *COCH* gene is located on chromosome 14, and encodes cochlin, a protein that consists  
54 of 550 amino acids. Cochlin is predicted to contain a signal peptide, an LCCL (Limulus factor  
55 C, Cochlin, and late gestation lung protein Lgl1) domain, two short intervening domains, and  
56 two vWFA (von Willebrandfactor A) domains. Cochlin is expressed in fibrocytes of the spiral  
57 ligament and spiral limbus, where it has been reported to assist in structural support, sound  
58 processing, and in the vestibular fibrocytes where is important in the maintenance of balance  
59 <sup>4</sup>. Proteolytic cleavage of cochlin, between the LCCL domain and the more C-terminal vWFA  
60 domains, results in a 16-kDa LCCL domain-containing peptide that is secreted and has been  
61 shown to play a role in innate immunity in the cochlea <sup>5</sup>. The vWFA domain-containing cochlin  
62 fragments are presumed to be extracellular matrix proteins, as cochlin vWFA2 was found to  
63 interact with collagens in-vitro, and cochlin is a major component of the cochlear extracellular  
64 matrix <sup>1,6</sup>.

65 The c.151C>T (p.Pro51Ser) founder mutation, affecting the LCCL domain, appears to be the  
66 most prevalent mutation in *COCH*, as it underlies hearing loss in >1000 Dutch and Belgian  
67 individuals <sup>7,8</sup>. Histopathology of a temporal bone from a p.Pro51Ser DFNA9 patient revealed  
68 significant loss and degeneration of fibrocytes in the cochlea (Robertson et al., 2006).  
69 Overexpression of murine cochlin containing the orthologue of the p.Pro51Ser variant in  
70 cultured cells, previously revealed that this mutation results in the formation of cytotoxic  
71 cochlin dimers and oligomers that sequester wildtype cochlin <sup>9</sup>. While the proteolytic cleavage

72 of cochlin was shown to be reduced by the p.Pro51Ser variant, and abolished by several  
73 other DFNA9-associated variants <sup>9</sup>, the potential contribution of decreased proteolytic  
74 cleavage to DFNA9 pathology requires further investigation.

75 All available data indicates that DFNA9 results from a gain-of-function and/or a dominant-  
76 negative disease mechanism, rather than from haploinsufficiency. Downregulation of the  
77 mutant allele, thereby alleviating the inner ear from the burden caused by the formation of  
78 cytotoxic cochlin dimers, therefore has high therapeutic potential. The lack of auditory and  
79 vestibular phenotypes in mice carrying a heterozygous protein-truncating mutation in *Coch*  
80 <sup>10</sup>, and in heterozygous family members of patients with early-onset hearing impairment due  
81 to homozygous protein-truncating mutations in *COCH* <sup>11</sup>, illustrate that sufficient functional  
82 cochlin proteins can be produced from a single healthy *COCH* allele. We speculate that a  
83 timely intervention might even prevent hearing impairment altogether.

84 Antisense oligonucleotides with DNA-like properties can be employed to target (pre-)mRNA  
85 molecules for degradation by the RNase H1 endonuclease <sup>12,13</sup>. Chemical modifications can  
86 be introduced in the 5' and 3' flanking nucleotides to increase stability and nuclease  
87 resistance, whilst maintaining a central gap region of oligo-deoxynucleotides to bind to the  
88 target RNA and thereby activate RNase H1 <sup>12</sup>. These AONs are named gapmers, and their  
89 ability to specifically target mutant alleles for degradation has shown great promise in  
90 treatment strategies for non-haploinsufficiency disorders such as Huntington's disease <sup>14,15</sup>.

91 For a successful application of AON therapy for non-haploinsufficiency disorders such as  
92 DFNA9 it is of major importance that the designed AONs only target the mutant (pre-)mRNA,  
93 and not the wildtype (pre-)mRNA, for degradation. As the options to design allele-  
94 discriminating AONs based on a single nucleotide difference are limited, we used Single-  
95 Molecule Real-Time (SMRT) sequencing to identify additional allele-discriminating variants  
96 that can be exploited for AON design. This resulted in the identification of 11 variants with a  
97 low population frequency (< 10%), that are specific to the c.151C>T mutant *COCH* haplotype.  
98 Our results show that both the c.151C>T mutation in *COCH*, and low-frequency variants in

99 *cis* with the DFNA9 mutation, can be used to specifically target mutant *COCH* transcripts for  
100 degradation by RNase H1. Lead molecule c.151C>T AON-E appears to be the most promising  
101 molecule for further preclinical investigation. As this AON targets the DFNA9-causing  
102 mutation, future clinical application is not limited by the potential presence of the target on  
103 the patient's wildtype allele.  
104

## 105 **Results**

### 106 **Identification of therapeutic targets**

107 In order to develop a mutant allele-specific therapy for DFNA9, reliable discrimination  
108 between the mutant and the wildtype allele is of vital importance. However, the single  
109 nucleotide changes in *COCH* underlying most cases of DFNA9, restrict the design of allele-  
110 discriminating therapies. In search of additional variants that can be exploited to improve  
111 discrimination between the c.151C>T mutant and wildtype *COCH* allele, we subjected the  
112 genomic *COCH* sequence of three DFNA9 patients to long-read single-molecule real-time  
113 (SMRT) sequencing. We amplified the *COCH* gene in three fragments that contain overlapping  
114 SNPs (c.151C>T and c.734-304T>G) to aid haplotype assembly (Figure 1A). The identified  
115 variants are annotated on transcript NM\_001135058.1, which does not contain the extended  
116 second coding exon. To identify targetable allele-specific variants that potentially allow for  
117 the treatment of the majority of the Dutch/Belgian DFNA9 patients, we filtered the variants *in*  
118 *cis* with the c.151C>T mutation for a population frequency below 20%. This resulted in the  
119 identification of 11 deep-intronic variants, that are specific for the c.151C>T mutant *COCH*  
120 allele, and have allele frequencies between 5% and 10% (Figure 1B; Table 1). The identified  
121 variants provide additional targets for the development of a mutant allele-specific genetic  
122 therapy. The identified variants were validated using Sanger sequencing, and confirmed to  
123 segregate with the c.151C<T mutation in *COCH* in two branches of Dutch DFNA9 families  
124 (Figure S1).

125

### 126 **Design and in-silico analysis of AONs**

127 We selected the c.151C>T founder mutation and the intronic, mutant allele-specific variant  
128 c.436+368\_436+369dupAG as targets for AON-based therapy. In contrast with the identified  
129 single nucleotide changes or deletions, the c.436+368\_436+369dupAG variant is the only  
130 multi-nucleotide variant that is specific to the mutant allele. Based on this, we hypothesized  
131 that AONs directed against this variant can provide the highest allele-specificity. To design

132 AONs, we combined the criteria that are commonly used to design splice-switching AONs  
133 with the previously established notion that RNase H1-dependent AONs require a series of  
134 nucleotides with DNA-like properties in their central region (Pallan and Egli, 2008; Aartsma-  
135 Rus et al., 2009; Slijkerman et al., 2018). All possible AONs were investigated for  
136 thermodynamic properties *in silico*, with particular attention for the difference in binding  
137 affinity between the mutant and wildtype *COCH* mRNA. Targeting regions of all AONs used  
138 in this study are shown in Figure 2A. Note that the difference in binding affinity between the  
139 mutant and wildtype *COCH* mRNA was predicted to be larger for the AONs directed against  
140 the dupAG variant (c.436+368\_436+369dupAG) as compared to those directed against the  
141 single nucleotide substitution (c.151C>T) (Table S1). The recognition of RNA/DNA duplexes by  
142 RNase H1 relates to the nature of the carbohydrate moiety in the AON backbone (2'-ribose  
143 vs. 2'-deoxyribose) <sup>16</sup>. Therefore, AONs were either comprised completely of  
144 phosphorothioate (PS)-linked DNA-bases, or of a central “gap” region of PS-DNA bases  
145 flanked by wings of 2'-O-methyl-RNA bases (gapmers). The gapmer design is particularly  
146 suitable for clinical application as the nuclease-resistant 2'-modified ribonucleotides provide  
147 an increased binding affinity and half-life time <sup>12,17,18</sup>.

148

#### 149 **Establishing stable transgenic cell lines expressing wildtype or c.151C>T *COCH*** 150 **minigenes**

151 The *COCH* expression levels in patient-derived primary fibroblast and Epstein-Barr virus-  
152 transformed lymphoblastoid cells are too low to reliably determine the effect of RNase H1-  
153 depended antisense oligonucleotides (AONs). Therefore, we used the Flp-In<sup>TM</sup> system to  
154 generate two stable transgenic T-REx<sup>TM</sup> 293 cell lines, expressing either a mutant (including  
155 three deep-intronic allele-discriminating variants; Figure 1) or a wildtype *COCH* minigene  
156 construct under the control of a tetracycline-dependent promoter. The minigene constructs  
157 span the genomic *COCH* sequence between the transcription initiation site and the last  
158 complete nucleotide triplet of exon 7 (Figure S2A). For both alleles, several clones were

159 expanded and investigated for inducible *COCH* expression. For further experiments, wildtype  
160 and mutant clones were selected with similar *COCH* expression levels upon activation of the  
161 tetracycline-dependent promotor (Figure S2B). Correct pre-mRNA splicing of both wildtype  
162 and mutant minigene *COCH* exons 1-7 was confirmed with RT-PCR (Figure S2C). In order to  
163 reliably quantify mutant and wildtype *COCH* transcript levels, we used a custom Taqman™  
164 assay (Applied Biosystems) in which different fluorophores are coupled to probes specific for  
165 either the mutant or the wildtype transcript.

166

167

168 **RNase H1-dependent antisense oligonucleotides specifically target mutant *COCH***  
169 **transcripts for degradation.**

170 As the *COCH* gene is continuously expressed in the human cochlea, we opted for an  
171 experimental design in which *COCH* transcription remains active. To induce *COCH*  
172 transcription, seeded cells were treated overnight with tetracycline (0.25µg/ml). Next morning,  
173 culture medium was replaced by fresh tetracycline-containing medium, and cells were  
174 transfected with the AONs at a final concentration in the medium of 250nM. An initial  
175 screening of AONs, revealed that six (out of seven) AONs directed against the c.151C>T  
176 mutation (Figure 2B) and four (out of seven) AONs directed against the dupAG variant (Figure  
177 2C) were able to decrease the level of mutant *COCH* transcripts as compared to a scrambled  
178 control AON.

179 Three of the most effective AONs directed against the c.151C>T mutation, and one AON  
180 directed against the dupAG variant, were analyzed in more detail using two concentrations of  
181 gapmer AONs and multiple technical replications (Figure 3). c.151C>T AON-A was able to  
182 induce a significant decrease in mutant *COCH* transcripts at a dose of 250nM ( $P = 0.02$ ,  
183 Tukey's multiple comparison test), but not at 100nM (Figure 3A). While AON-B showed a  
184 stronger effect in comparison to AON-A in the initial screening, the effect sizes of AON-A and  
185 -B were very similar in this replication experiment (Figure 3B). A significant decrease of mutant



186 *COCH* transcripts was found at both concentrations ( $P < 0.0012$ , Tukey's multiple comparison  
187 test). However, the dose of 250nM AON-B was not able to induce a stronger decrease of  
188 mutant *COCH* transcripts as compared to the 100nM dose. The third AON directed against  
189 the c.151C>T mutation that was investigated in more detail, AON-E, did show a dose-  
190 dependent effect size. At 100nM, the level of mutant *COCH* transcripts was approximately  
191 half of the amount of transcripts detected in cells treated with a scrambled control AON ( $P <$   
192 0.0002, Tukey's multiple comparison test). Mutant *COCH* transcript levels were even further  
193 decreased in cells transfected with 250nM of AON-E ( $P < 0.0001$ , Tukey's multiple  
194 comparison test). While on average the AONs directed against the dupAG variants appeared  
195 slightly less effective in the initial AON screen, transfection of mutant *COCH* minigene  
196 expressing cells with dupAG AON-B resulted in a significant decrease in mutant *COCH*  
197 transcripts at both concentrations tested (Figure 3D;  $P < 0.0009$ , Tukey's multiple comparison  
198 test). The effect size of dupAG AON-B was similar to the effect observed for c.151C>T AON-  
199 A and -B.

200 Finally, we investigated the specificity of these four AONs in discriminating between mutant  
201 and wildtype *COCH* transcripts (Figure 4). We chose to compare the AONs at a concentration  
202 of 100nM, as three out of the four AONs were able to significantly reduce mutant *COCH*  
203 transcript levels at this concentration. As observed previously, transfection of mutant *COCH*  
204 minigene cells with c.151C>T AON-B, c.151C>T AON-E, and dupAG AON-B, significantly  
205 decreased mutant *COCH* transcripts levels as compared to a scrambled control AON (Figure  
206 4A). None of the four AONs induced a significant decrease of wildtype *COCH* transcripts  
207 when transfected in wildtype *COCH* expressing transgenic cells, although we did observe a  
208 marked decrease in both mutant and wildtype *COCH* transcript levels resulting from the  
209 transfection of c.151C>T AON-A (Figure 4B). Likely, the correction for multiple comparisons  
210 explains the lack of a significant difference between c.151C>T AON-A treated and scrambled  
211 AON treated wildtype *COCH* minigene cells. The results for c.151C>T AON-E are of particular  
212 interest, as this gapmer was able to decrease the levels of mutant *COCH* transcripts with

213 almost 60% compared to a scrambled AON, but had no significant effect on the level of  
214 wildtype *COCH* transcripts. In addition, dupAG AON-B also displayed perfect allele  
215 discrimination, albeit with a smaller effect size on mutant *COCH* transcripts as compared to  
216 c.151C>T AON-E.  
217

218 **Discussion**

219 The c.151C>T founder mutation in *COCH* is estimated to be one of most prevalent causes of  
220 dominantly-inherited, adult-onset hearing loss and vestibular dysfunction, affecting >1000  
221 individuals in the Dutch/Belgian population. In this work, we present 11 intronic variants *in cis*  
222 with the c.151C>T mutation, and show that these variants can be exploited for the  
223 development of a mutant allele-specific therapy using RNase H1-dependent antisense  
224 oligonucleotides (AONs). We identified a highly effective and mutant-allele specific AON,  
225 directed against the c.151C>T mutation, as the most promising candidate for further  
226 preclinical development.

227

228 The ability of antisense oligonucleotides (AONs) to specifically target mutant transcripts for  
229 degradation is of key importance for the development of an AON-based therapy for  
230 dominantly-inherited disorders with a dominant-negative or gain-of-function disease  
231 mechanism such as DFNA9. The therapeutic strategy must be potent enough to prevent the  
232 synthesis of proteins from the mutant allele, but allow sufficient protein synthesis from the  
233 wildtype allele for normal inner ear function. For any antisense-based approach,  
234 discrimination between alleles based on a single nucleotide difference presents as a potential  
235 pitfall in terms of concomitantly downregulation of the wildtype allele<sup>19-21</sup>. Recently published  
236 AONs directed against a mutation in *NR2E3*, causative for dominantly inherited retinitis  
237 pigmentosa, also significantly reduced the wildtype transcript and protein levels<sup>22</sup>. In  
238 contrast, for Huntington's disease (*HTT* gene), also resulting from a non-haploinsufficiency  
239 disease mechanism, the use of gapmer AONs to target a single nucleotide polymorphism  
240 (SNP) specific to the mutant allele emerged as a promising therapeutic strategy *in vitro* and  
241 *in vivo*<sup>15</sup>. Haplotype mapping of candidate SNPs in the *HTT* gene was previously done  
242 manually via genotyping of family trios<sup>23</sup>. As nearly all cases of DFNA9 are caused by single  
243 nucleotide changes (Bae et al., 2014), we explored the presence of mutant allele-specific  
244 variants that can serve as additional targets to develop a therapeutic strategy for the most

245 frequently occurring DFNA9 mutation c.151C>T. Here, we employed SMRT sequencing<sup>24</sup> to  
246 sequence the complete mutant *COCH* haplotype using three overlapping PCR amplicons.  
247 With average polymerase read lengths of up to 30kb, the SMRT sequencing platform presents  
248 a powerful tool to identify genetic variants on the mutant allele.  
249 The c.151C>T *COCH* allele contains a remarkably high number of SNPs with a relatively low  
250 allele frequency (5%) in the non-Finnish European population according to the gnomAD  
251 database (v.2.1.1)<sup>25</sup>. As the c.151C>T founder mutation arose on a relatively uncommon  
252 haplotype, we estimate that less than 5% of DFNA9 patients are homozygous for these SNPs.  
253 Therefore, approximately 95% of DFNA9 patients with the c.151C>T mutation can be treated  
254 with AONs directed against one of these mutant allele-specific variants. In comparison, it was  
255 reported that targeting one of three relatively frequent SNPs can provide a treatment for  
256 approximately 85% of patients suffering from Huntington's disease<sup>23</sup>. In contrast to the  
257 identified mutant allele-specific SNPs in *HTT*, all of the identified variants in *COCH* map to the  
258 introns. As such, the identified mutant allele-specific variants in *COCH* are only amenable to  
259 AON-mediated pre-mRNA degradation by the RNase H1 enzyme, and not to mRNA  
260 interference (RNAi)<sup>26-28</sup>.

261  
262 We designed AONs to specifically target mutant *COCH* transcripts for RNase H1 degradation.  
263 In addition to targeting the DFNA9-associated mutation c.151C>T, we opted to target the 2bp  
264 duplication c.436+368\_436+369dupAG *in cis* with the DFNA9 mutation. In-silico analysis of  
265 thermodynamic AON properties indicated that AONs directed against the dupAG variant  
266 possess a larger difference in binding affinity between the mutant and the wildtype transcript  
267 as compared to AONs directed against the c.151C>T mutation (Table S1). The on-target and  
268 off-target efficacy of AONs was investigated in stable transgenic cells that express mutant or  
269 wildtype *COCH* minigenes under control of a tetracycline-dependent promoter. A similar cell  
270 model was previously used to investigate the kinetics of RNase H1-dependent antisense  
271 oligonucleotide induced degradation<sup>13</sup>, and offers a suitable alternative to the patient-specific

272 fibroblast and lymphoblastoid cell lines that hardly express *COCH*. We opted to investigate  
273 the effect of AONs under continuous activation of *COCH* transcription, which best resembles  
274 the situation in the cochlea, where constant *COCH* expression amounts to synthesis of one  
275 of the most abundant proteins in the entire organ <sup>1,6</sup>. The gapmer configuration of c.151C>T  
276 AON-E was the most effective of all the designed AON molecules, and at the highest dose  
277 resulted in a decrease of mutant *COCH* transcripts to < 15% of the number of transcripts in  
278 cells treated with a scrambled control AON. The effect of AONs directed against the  
279 c.436+368\_436+369dupAG (dupAG) variant was overall lower as compared to the c.151C>T  
280 AONs in the initial screening experiment. The effect of dupAG AON-B was also less potent as  
281 compared to c.151C>T AON-E. This could result from small differences in biochemical  
282 properties. The predicted on-target binding affinity of all AONs directed against the dupAG  
283 variant was indeed lower as compared to AONs directed against the c.151C>T mutation.  
284 Biochemical properties of the dupAG AONs can be improved by increasing the length of the  
285 AON, or by introducing chemically modified nucleotides that enhance binding affinity.  
286 However, the lower effect of the dupAG AONs on mutant *COCH* transcript levels could also  
287 be related to the fact that these AONs are directed against an intronic variant, which is only  
288 present in unspliced nuclear pre-mRNA. In contrast, AONs directed against exonic targets  
289 act on all transcripts, both in the nucleus and cytoplasm. With the observed efficiency and  
290 high allele-specificity of c.151C>T AON-E, for which therapeutic application is also not  
291 constrained by a small percentage of individuals that is homozygous for the target variant, we  
292 concluded that there is currently little need to optimize the AONs that target intronic variants.

293 The transient effect of AONs is both an advantage and a potential limitation for future clinical  
294 applications. It lowers the risk of sustained adverse or off-target effects that could accompany  
295 genome editing techniques, but it also implies that a repeated delivery is likely to be required  
296 to achieve maximum efficacy. AON-based splice-modulation therapy for hearing impairment  
297 in Usher syndrome type 1C is extensively investigated in the fetal and post-natal cochlea <sup>29,30</sup>.

298 Delprat et al previously reported the use of phosphorothioate oligonucleotide-mediated  
299 knockdown to investigate the role of the otospiralin protein in the inner ear protein <sup>31</sup>. In this  
300 study, they placed pieces of gel foam loaded with AONs on the round window membrane  
301 (RWM) of rats, and observed the effects of otospiralin knockdown already two days later <sup>31</sup>.  
302 Otospiralin and cochlin are both expressed by the otic fibrocytes, which indicates that cellular  
303 uptake of AONs is unlikely to be a limiting factor for DFNA9 therapy. Although many  
304 advancements in cochlear drug delivery have been made since (reviewed by e.g. <sup>32-34</sup>, a huge  
305 gap in knowledge remains in terms of safety, stability and biodistribution of gapmer AONs in  
306 the (adult) human cochlea. Further investigation into the feasibility of RWM diffusion as a  
307 potential delivery method for AON-based therapy in patients is also warranted, as the gapmer  
308 composition of AONs may affect diffusion properties, and the thickness of the human RWM  
309 and larger size of the cochlea are likely to affect the biodistribution of AONs.

310 The reported age of onset of auditory and vestibular symptoms in c.151C>T DFNA9 in  
311 patients, on average in the 3rd or 4th decade of life <sup>35</sup>, suggests that the inner ear can cope  
312 with the burden of mutant cochlin proteins for several decades before it leads to detectable  
313 auditory and vestibular damage and dysfunction. It has also been shown that otic fibrocytes,  
314 the main cell type expressing cochlin, display some capacity for self-renewal <sup>36</sup>. In the most  
315 optimal situation, AONs might be able to remove the burden of mutant cochlin proteins to an  
316 extent that allows for fibrocyte renewal and thereby possibly improved auditory and vestibular  
317 function. Halting the disease progression in an early stage is likely a more realistic outcome,  
318 and would already greatly improve the patient's quality of life. Further pre-clinical studies in  
319 animal models are therefore not only required to determine both the therapeutic efficacy and  
320 allele-specificity on the long term, but also the need and frequency for repeated delivery.

321 In conclusion, this study shows that AONs can be engineered to specifically target the  
322 c.151C>T mutant *COCH* transcript for degradation. Targeting of intronic, mutant-allele-  
323 specific variants present an interesting opportunity to further improve efficacy and allele-

324 specificity of AON-based therapy for DFNA9. Models for the long-term investigation of the  
325 effects of AONs are not (yet) available. Efficacy studies in appropriate animal models will  
326 provide important insights into the feasibility and specificity of AON-based therapy for  
327 DFNA9. Combined with the rapidly evolving procedures for repeated drug delivery to the  
328 cochlea, the AONs developed in this study form the first step towards the development of a  
329 genetic therapy for DFNA9.

330

331 **Materials and methods**

332 ***Single-Molecule Real-Time (SMRT) sequencing of COCH haplotypes***

333 This study was approved by the medical ethics committee of the Radboud University Medical  
334 Center in Nijmegen, the Netherlands and was carried out according to the Declaration of  
335 Helsinki. Written informed consent was obtained from all participants. DNA samples of three  
336 seemingly unrelated DNFA9 patients carrying the c.151C>T mutation in *COCH* were selected  
337 for Single-Molecule Real-Time (SMRT) sequencing (Pacific Biosciences, Menlo Park, CA,  
338 USA) to identify shared variants on the mutant allele. The *COCH* gene was amplified in three  
339 overlapping amplicons (Figure 1), in which known haplotype-specific variants were  
340 anticipated to be present to aid assembly. Fragments were amplified with primers 5'-  
341 GAAGTTCGGTTCTCAGGCC-3' and 5'-TGCCATCGTCATACAAAAGG-3' (fragment 1), 5'-  
342 CAAAATCTGGAATGGTATGGAAG-3' and 5'-GATCAAATGCAGACCTAGCC-3' (fragment 2)  
343 and 5'-TCCCCTGCAGTACTTTTTGTC-3' and 5'-GTAAGCCAGCTTACAATAACTC-3'  
344 (fragment 3), using Q5 polymerase (New England Biolabs, Ipswich, MA, USA) according to  
345 manufacturer's instructions. Amplicons were pooled per sample, and library preparation was  
346 done according to protocol 'Procedure and Checklist – Preparing SMRTbell Libraries using  
347 PacBio Barcoded Adapters for Multiplex SMRT Sequencing' (Pacific Biosciences, Part  
348 Number 100-538-700-02). Generation of polymerase bound SMRTbell complexes was  
349 performed using the Sample Setup option in SMRTLink 6.0 (Pacific Biosciences) and  
350 sequencing was performed on a Sequel I systems (Pacific Biosciences). Following the run,  
351 generation of circular consensus reads (CCS) and mapping of these reads was performed  
352 using SMRTLink 6.0. Bam files were loaded into the Sequence Pilot software (JSI medical  
353 systems) to perform variant calling. The variants were subsequently filtered to excluded  
354 homopolymers, homozygous variants. The identified variants with a low population frequency  
355 (< 10%) were considered as potential therapeutic targets, and validated using targeted sanger  
356 sequencing. Segregation analysis in two branches of large Dutch DNFA9 families (W02-006



357 and W00-330) was used to confirm the presence of the identified variants on the mutant  
358 haplotype. Primers used in the segregation analyses are listed in table S2

359

### 360 ***Antisense oligonucleotides***

361 Antisense oligonucleotides (AONs) were designed using previously published criteria for  
362 splice-modulating AONs<sup>37,38</sup>. In summary, the sequences surrounding the c.151C>T and  
363 c.436+368\_436+369dupAG variants on the mutant *COCH* allele were analyzed *in silico* for  
364 AON-accessibility. The thermodynamic properties of every possible 20-mer antisense  
365 oligonucleotide were analyzed *in silico* for AON-AON duplex formation, the formation of AON-  
366 target mRNA duplexes and the formation of AON-wildtype mRNA duplexes using the  
367 RNAstructure webserver<sup>39</sup>. The uniqueness of the AON target sequences was determined by  
368 BLAST analysis. The seven most optimal AONs were purchased from Eurogentec (Liège,  
369 Belgium) and dissolved in phosphate-buffered saline (PBS) before use. As a non-binding  
370 control, an AON with a scrambled nucleotide sequence was also acquired. Sequences and  
371 AON chemistry are presented in table S1.

372

### 373 ***Generation of transgenic COCH minigene cell lines.***

374 The genomic region of wildtype and c.151C>T mutant *COCH* exons 1 to 7 (transcript variant  
375 1; NM\_001135058.1), including the haplotype-specific variants, was amplified from the  
376 translation initiation site to the splice donor site of exon 7 using primers 5'-  
377 ATGTCCGCAGCCTGGATC-3' and 5'-GGCTTGAACAAGGCCACACA-3'. The mutant and  
378 wildtype amplicons were subsequently cloned into the pgLAP1 vector (Addgene plasmid  
379 #19702) using Gateway cloning technology (Invitrogen, Carlsbad, USA). Upon sequence  
380 validation, *COCH*-containing pgLAP1 vectors were co-transfected with pOGG44 (# V600520,  
381 Invitrogen), encoding Flp-Recombinase, in FLP-in<sup>TM</sup> T-REx<sup>TM</sup> 293 cells (# R78007, Invitrogen)  
382 using polyethylenimine. Cells in which the *COCH* sequence was stably integrated were  
383 selected for using DMEM-AQ medium (Sigma Aldrich, Saint Louis, USA) supplemented with

384 10% Fetal Calf Serum, 1% Penicillin/Streptomycin, Sodium Pyruvate, 10ug/ml blasticidin and  
385 100ug/ml hygromycin. Individual hygromycin-resistant clones were expanded and  
386 subsequently tested for the induction of *COCH* transcription by tetracycline using an allele-  
387 specific TaqMan™ assay. Correct splicing of the *COCH* minigenes was assessed using a  
388 forward primer on exon 1 (5'-TCCGCAGCCTGGATCCCGG-3') and reverse primer on exon 7  
389 (5'-GGCTTGAACAAGGCCACACA-3').

390

### 391 ***Delivery of RNase H1-dependent antisense oligonucleotides***

392 Wildtype and mutant *COCH*-expressing FLP-in™ T-REx™ 293 cells were cultured in DMEM-  
393 AQ medium (Sigma Aldrich, Saint Louis, USA) supplemented with 10% Fetal Calf Serum, 1%  
394 Penicillin/Streptomycin, Sodium Pyruvate, 10ug/ml blasticidin and 100ug/ml hygromycin. For  
395 AON treatments, cells were seeded in 12-well or 24-well plates at ~50% confluency. Next day,  
396 *COCH* transcription was activated through the administration of 0.25 µg/ml tetracycline (#  
397 T7660, Sigma Aldrich). Twenty hours after induction, cells were transfected with AONs using  
398 Lipofectamine 2000 (Invitrogen) according to manufacturer's instructions, using a 1:2 ratio of  
399 AON (in µg) and lipofectamine reagent (in µl). AON doses are calculated as final concentration  
400 in the culture medium. Cells were collected for transcript analysis 24 hours after AON delivery.

401

### 402 ***RNA extraction and cDNA synthesis***

403 Total RNA was extracted from cells using the Nucleospin RNA mini kit (# 740955, Machery-  
404 Nagel) according to manufacturer's instructions. First strand cDNA was generated using  
405 iScript cDNA synthesis reagents (Bio-Rad, Hercules, USA) using a fixed amount of RNA input  
406 (250ng) in a 10ul reaction volume. The obtained cDNA was diluted four times and used for  
407 transcript analysis.

408

### 409 ***Analysis of COCH transcript levels***

410 Diluted cDNA (4µl) was used as input in an allele-specific TaqMan assay using primers 5'-  
411 GGACATCAGGAAAGAGAAAGCAGAT-3' and 5'-CCCATACACAGAGAATTCCTCAAGAG-3',  
412 a wildtype allele-specific VIC-labeled probe 5'-CCCCCTGGGCAGAG-3' and a mutant allele-  
413 specific FAM-labeled probe 5'-CCCCCTGAGCAGAG-3'. Expression of *RPS18* was analyzed  
414 with GoTaq (# A6002, Promega), using primers 5'-ATACAGCCAGGTCCTAGCCA-3' and 5'-  
415 AAGTGACGCAGCCCTCTATG-3'. Abundance of mutant and wildtype *COCH* transcripts was  
416 calculated relative to the expression of the housekeeping gene *RPS18*.

417

#### 418 **Acknowledgments**

419 This work is financially supported by the Dutch Organization for Scientific research (NWO  
420 Offroad grant 40-08125-98-16065; E.d.V) and the Queen Elisabeth Medical Foundation  
421 for Neurosciences (E.d.V and E.v.W.). Patent has been filed for the AONs described in this  
422 manuscript under number 19206490.5. E.d.V. and E.v.W. report being employed by  
423 Radboudumc and inventor on this patent. SMRT sequencing was done at the Radboudumc  
424 Genome Technology Center.

425

#### 426 **Author Contributions**

427 Conceptualization: E.d.V. and E.v.W.; Methodology: E.d.V. and J.P.; Formal analysis: E.d.V.;  
428 Investigation: E.d.V., J.P., J.C.M., A.A.M, J.O., S.v.d.H.; Resources: E.d.V, K.N., R.P. and  
429 E.v.W.; Writing – original draft: E.d.V.; Writing – review and editing: H.K. and E.v.W.,  
430 Supervision: E.d.V, E.vW and H.K.

431

#### 432 **Conflict of interest**

433 The authors report no conflict of interest.

434 **Reference list:**

- 435 1. Robertson, NG, Cremers, CWRJ, Huygen, PLM, Ikezono, T, Krastins, B, Kremer, H, *et*  
436 *al.* (2006). Cochlin immunostaining of inner ear pathologic deposits and proteomic  
437 analysis in DFNA9 deafness and vestibular dysfunction. *Hum Mol Genet* **15**: 1071–  
438 1085.
- 439 2. Bom, SJH, Kemperman, MH, Huygen, PLM, Luijendijk, MWJ and Cremers, CWRJ  
440 (2003). Cross-sectional analysis of hearing threshold in relation to age in a large  
441 family with cochleovestibular impairment thoroughly genotyped for DFNA9/COCH.  
442 *Ann. Otol. Rhinol. Laryngol.* **112**: 280–286.
- 443 3. De Belder, J, Matthysen, S, Claes, AJ, Mertens, G, Van de Heyning, P and Van  
444 Rompaey, V (2017). Does Otovestibular Loss in the Autosomal Dominant Disorder  
445 DFNA9 Have an Impact of on Cognition? A Systematic Review. *Front Neurosci* **11**:  
446 735.
- 447 4. Gallant, E, Francey, L, Fetting, H, Kaur, M, Hakonarson, H, Clark, D, *et al.* (2013).  
448 Novel COCH mutation in a family with autosomal dominant late onset sensorineural  
449 hearing impairment and tinnitus. *Am J Otolaryngol* **34**: 230–235.
- 450 5. Jung, J, Yoo, JE, Choe, YH, Park, SC, Lee, HJ, Lee, HJ, *et al.* (2019). Cleaved Cochlin  
451 Sequesters *Pseudomonas aeruginosa* and Activates Innate Immunity in the Inner Ear.  
452 *Cell Host & Microbe* **25**: 513–525.e6.
- 453 6. Nagy, I, Trexler, M and Pathy, L (2008). The second von Willebrand type A domain of  
454 cochlin has high affinity for type I, type II and type IV collagens. *Febs Lett* **582**: 4003–  
455 4007.
- 456 7. de Kok, YJ, Bom, SJ, Brunt, TM, Kemperman, MH, van Beusekom, E, van der Velde-  
457 Visser, SD, *et al.* (1999). A Pro51Ser mutation in the COCH gene is associated with  
458 late onset autosomal dominant progressive sensorineural hearing loss with vestibular  
459 defects. *Hum Mol Genet* **8**: 361–366.

- 460 8. Fransen, E, Verstreken, M, Bom, SJ, Lemaire, F, Kemperman, MH, de Kok, YJ, *et al.*  
461 (2001). A common ancestor for COCH related cochleovestibular (DFNA9) patients in  
462 Belgium and The Netherlands bearing the P51S mutation. *J. Med. Genet.* **38**: 61–65.
- 463 9. Yao, J, Py, BF, Zhu, H, Bao, J and Yuan, J (2010). Role of protein misfolding in  
464 DFNA9 hearing loss. *Journal of Biological Chemistry* **285**: 14909–14919.
- 465 10. Jones, SM, Robertson, NG, Given, S, Giersch, ABS, Liberman, MC and Morton, CC  
466 (2011). Hearing and vestibular deficits in the Coch(-/-) null mouse model: comparison  
467 to the Coch(G88E/G88E) mouse and to DFNA9 hearing and balance disorder. *Hear.*  
468 *Res.* **272**: 42–48.
- 469 11. JanssensdeVarebeke, SPF, Van Camp, G, Peeters, N, Elinck, E, Widdershoven, J,  
470 Cox, T, *et al.* (2018). Bi-allelic inactivating variants in the COCH gene cause  
471 autosomal recessive prelingual hearing impairment. *Eur. J. Hum. Genet.* **23**: 42.
- 472 12. Crooke, ST (1999). Molecular mechanisms of action of antisense drugs. *Biochimica et*  
473 *Biophysica Acta (BBA) - Gene Structure and Expression* **1489**: 31–43.
- 474 13. Vickers, TA and Crooke, ST (2015). The rates of the major steps in the molecular  
475 mechanism of RNase H1-dependent antisense oligonucleotide induced degradation  
476 of RNA. *Nucleic Acids Res* **43**: 8955–8963.
- 477 14. Vickers, TA and Crooke, ST (2014). Antisense Oligonucleotides Capable of Promoting  
478 Specific Target mRNA Reduction via Competing RNase H1-Dependent and  
479 Independent Mechanisms. *PLoS One* **9**: e108625.
- 480 15. Southwell, AL, Kordasiewicz, HB, Langbehn, D, Skotte, NH, Parsons, MP, Villanueva,  
481 EB, *et al.* (2018). Huntingtin suppression restores cognitive function in a mouse model  
482 of Huntington's disease. *Sci Transl Med* **10**: eaar3959.
- 483 16. Pallan, PS and Egli, M (2008). Insights into RNA/DNA hybrid recognition and  
484 processing by RNase H from the crystal structure of a non-specific enzyme-dsDNA  
485 complex. *Cell Cycle* **7**: 2562–2569.

- 486 17. Lima, WF and Crooke, ST (1997). Binding affinity and specificity of Escherichia coli  
487 RNase H1: impact on the kinetics of catalysis of antisense oligonucleotide-RNA  
488 hybrids. *Biochemistry* **36**: 390–398.
- 489 18. Bennett, CF and Swayze, EE (2010). RNA targeting therapeutics: molecular  
490 mechanisms of antisense oligonucleotides as a therapeutic platform. *Annu. Rev.*  
491 *Pharmacol. Toxicol.* **50**: 259–293.
- 492 19. Zaleta-Rivera, K, Dainis, A, Ribeiro, AJS, Cordero, P, Rubio, G, Shang, C, *et al.*  
493 (2019). Allele-Specific Silencing Ameliorates Restrictive Cardiomyopathy Attributable  
494 to a Human Myosin Regulatory Light Chain Mutation. *Circulation* **140**: 765–778.
- 495 20. Jiang, J, Wakimoto, H, Seidman, JG and Seidman, CE (2013). Allele-specific silencing  
496 of mutant Myh6 transcripts in mice suppresses hypertrophic cardiomyopathy.  
497 *Science* **342**: 111–114.
- 498 21. Southwell, AL, Skotte, NH, Kordasiewicz, HB, Østergaard, ME, Watt, AT, Carroll, JB,  
499 *et al.* (2014). In vivo evaluation of candidate allele-specific mutant huntingtin gene  
500 silencing antisense oligonucleotides. *Mol. Ther.* **22**: 2093–2106.
- 501 22. Naessens, S, Ruyschaert, L, Lefever, S, Coppieters, F and De Baere, E (2019).  
502 Antisense Oligonucleotide-Based Downregulation of the G56R Pathogenic Variant  
503 Causing NR2E3-Associated Autosomal Dominant Retinitis Pigmentosa **10**: 363.
- 504 23. Carroll, JB, Warby, SC, Southwell, AL, Doty, CN, Greenlee, S, Skotte, N, *et al.* (2011).  
505 Potent and selective antisense oligonucleotides targeting single-nucleotide  
506 polymorphisms in the Huntington disease gene / allele-specific silencing of mutant  
507 huntingtin. *Mol. Ther.* **19**: 2178–2185.
- 508 24. Eid, J, Fehr, A, Gray, J, Luong, K, Lyle, J, Otto, G, *et al.* (2009). Real-time DNA  
509 sequencing from single polymerase molecules. *Science* **323**: 133–138.
- 510 25. Karczewski, KJ, Francioli, LC, Tiao, G, Cummings, BB, Alföldi, J, Wang, Q, *et al.*  
511 (2019). Variation across 141,456 human exomes and genomes reveals the spectrum

- 512 of loss-of-function intolerance across human protein-coding genes. *bioRxiv* **42**:  
513 531210.
- 514 26. Vickers, TA, Koo, S, Bennett, CF, Crooke, ST, Dean, NM and Baker, BF (2003).  
515 Efficient Reduction of Target RNAs by Small Interfering RNA and RNase H-dependent  
516 Antisense Agents. *J Biol Chem* **278**: 7108–7118.
- 517 27. Østergaard, ME, Kumar, P, Nichols, J, Watt, A, Sharma, PK, Nielsen, P, *et al.* (2015).  
518 Allele-Selective Inhibition of Mutant Huntingtin with 2-Thio- and C5- Triazolylphenyl-  
519 Deoxythymidine-Modified Antisense Oligonucleotides. *Nucleic Acid Ther* **25**: 266–  
520 274.
- 521 28. Smith, CIE and Zain, R (2019). Therapeutic Oligonucleotides: State of the Art. *Annu.*  
522 *Rev. Pharmacol. Toxicol.* **59**: 605–630.
- 523 29. Lentz, JJ, Jodelka, FM, Hinrich, AJ, McCaffrey, KE, Farris, HE, Spalitta, MJ, *et al.*  
524 (2013). Rescue of hearing and vestibular function by antisense oligonucleotides in a  
525 mouse model of human deafness. *Nat Med* **19**: 345–350.
- 526 30. Hastings, ML and Brigande, JV (2020). Fetal gene therapy and pharmacotherapy to  
527 treat congenital hearing loss and vestibular dysfunction. *Hear. Res.:*  
528 107931doi:10.1016/j.heares.2020.107931.
- 529 31. Delprat, B, Boulanger, A, Wang, J, Beaudoin, V, Guitton, MJ, Ventéo, S, *et al.* (2002).  
530 Downregulation of otospiralin, a novel inner ear protein, causes hair cell degeneration  
531 and deafness. *J. Neurosci.* **22**: 1718–1725.
- 532 32. Plontke, SK and Salt, AN (2018). Local drug delivery to the inner ear: Principles,  
533 practice, and future challenges. *Hear. Res.* **368**: 1–2.
- 534 33. Chin, OY and Diaz, RC (2019). State-of-the-art methods in clinical intracochlear drug  
535 delivery. *Curr Opin Otolaryngol Head Neck Surg* **27**: 381–386.
- 536 34. Hao, J and Li, SK (2019). Inner ear drug delivery: Recent advances, challenges, and  
537 perspective. *Eur J Pharm Sci* **126**: 82–92.

- 538 35. JanssensdeVarebeke, S, Topsakal, V, Van Camp, G and Van Rompaey, V (2019). A  
539 systematic review of hearing and vestibular function in carriers of the Pro51Ser  
540 mutation in the COCH gene. *Eur Arch Otorhinolaryngol* **17**: 751–12.
- 541 36. Bohnenpoll, T, Trowe, M-O, Wojahn, I, Taketo, MM, Petry, M and Kispert, A (2014).  
542 Canonical Wnt signaling regulates the proliferative expansion and differentiation of  
543 fibrocytes in the murine inner ear. *Dev. Biol.* **391**: 54–65.
- 544 37. Aartsma-Rus, A, van Vliet, L, Hirschi, M, Janson, AAM, Heemskerk, H, de Winter, CL,  
545 *et al.* (2009). Guidelines for antisense oligonucleotide design and insight into splice-  
546 modulating mechanisms. *Mol. Ther.* **17**: 548–553.
- 547 38. Slijkerman, R, Kremer, H and van Wijk, E (2018). Antisense Oligonucleotide Design  
548 and Evaluation of Splice-Modulating Properties Using Cell-Based Assays. *Methods*  
549 *Mol. Biol.* **1828**: 519–530.
- 550 39. Reuter, JS and Mathews, DH (2010). RNAstructure: software for RNA secondary  
551 structure prediction and analysis. *BMC Bioinformatics* **11**: 1–9.
- 552



553 **Tables:**

554

555 **Table 1. Identified low-frequency variants on the c.151C>T COCH haplotype.**

| Location | SNP Identifier | Nucleotide change (c. HGVS) | Amino acid change | Frequency (percentage) GnomAD European non-finnish |
|----------|----------------|-----------------------------|-------------------|----------------------------------------------------|
| e4       | rs28938175     | c.151C>T                    | Pro51Ser          | T: 0.0032                                          |
| i4       | rs143609554    | c.240-239A>T                |                   | T: 5.4                                             |
| i6       | rs7140538      | c.436+185G>T                |                   | T: 5.5                                             |
| i6       | rs10701465     | c.436+368_436+369dupAG      |                   | dupAG: 5.5                                         |
| i8       | rs186627205    | c.629+1186T>C               |                   | C: 5.4                                             |
| i8       | rs200080665    | c.629+1779delC              |                   | delC: 5.4                                          |
| i8       | rs368638521    | c.629+1807delA              |                   | delA: 5.9*                                         |
| i8       | rs554238963    | c.629+1809A>C               |                   | C: 9.9*                                            |
| i8       | rs184635675    | c.629+1812A>T               |                   | T: 5.4                                             |
| i8       | rs2295128      | c.630-208A>C                |                   | C: 5.3                                             |
| i9       | rs28362773     | c.734-304T>G                |                   | G: 7.2                                             |
| i11      | rs17097458     | c.1477+9C>A                 |                   | A: 5.4                                             |

\* no data in GnomAD, frequency data from dbSNP 153

556

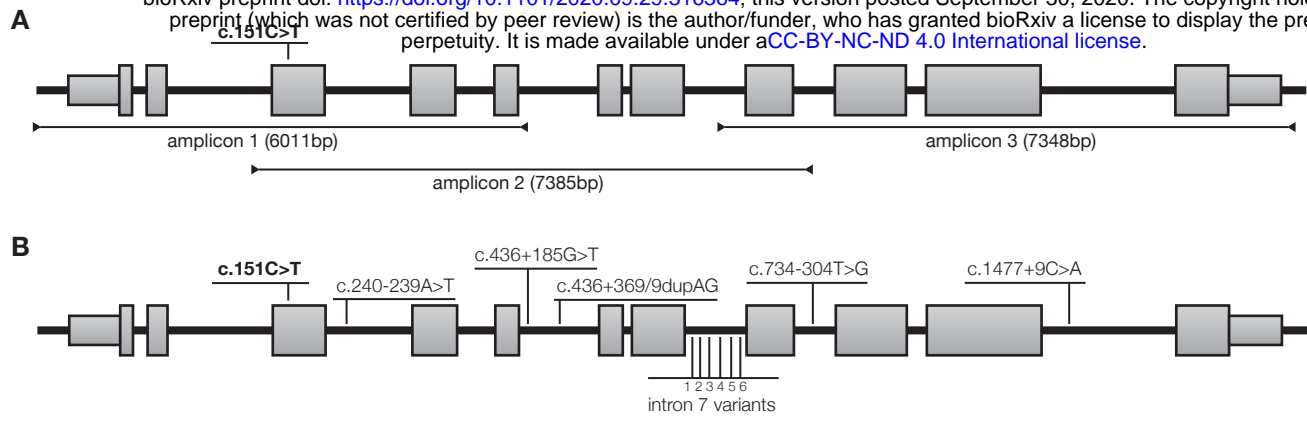

**Figure 1. *COCH* haplotype analysis. A)** Overview of the amplicons used to determine the haplotype-specific variants on the c.151C>T mutant *COCH* allele. Amplicon length is indicated in base pairs (bp) between brackets. **B)** Variants with a low population frequency (< 10%) on the c.151C>T mutant haplotype. The six identified variants in intron 7 are 1: c.629+1186T>C; 2: c.629+1779delC; 3: c.629+1807delA; 4: c.629+1809A>C; 5: c.629+1812A>T; 6: c.630-208A>C. Intron-exon structure of transcript NM\_001135058.1 is depicted. The c.151C>T variant, causative for DFNA9, is indicated in bold.



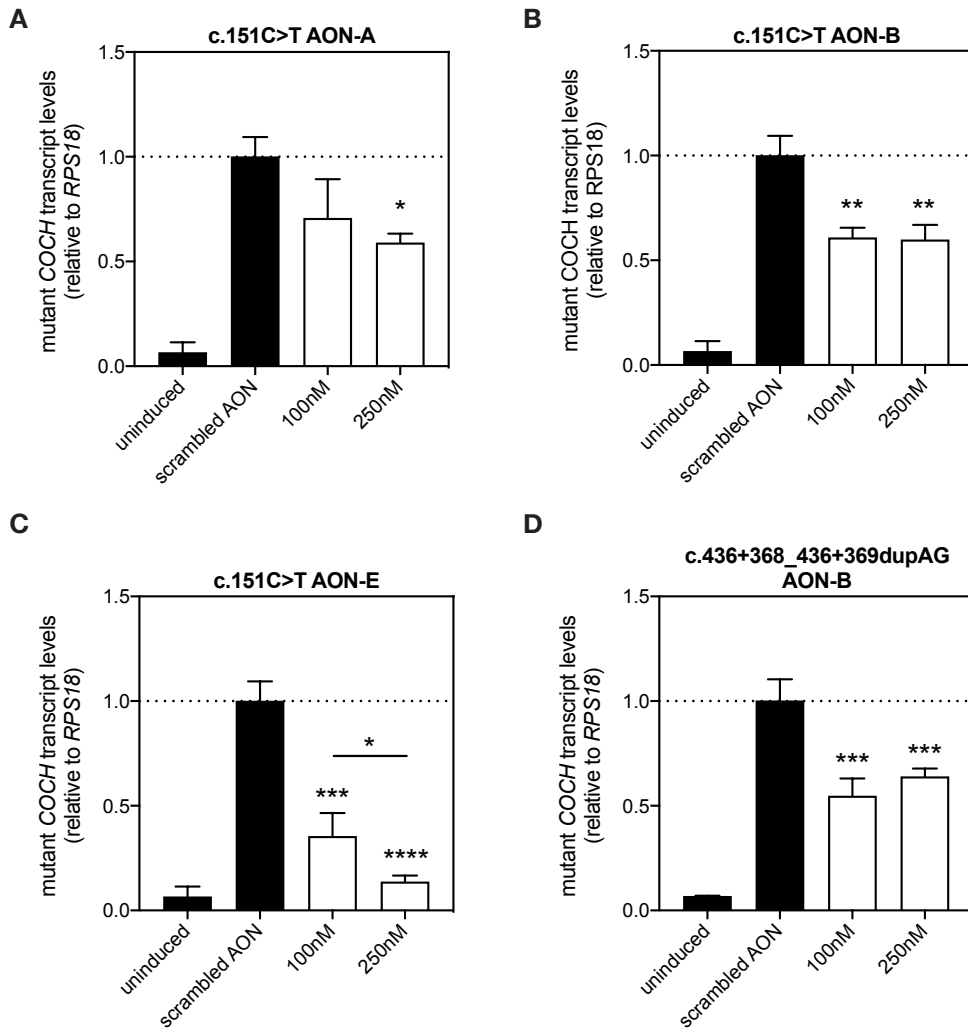

**Figure 3. Identified candidate AONs induce a significant decrease in mutant *COCH* transcript levels.** To confirm the effect of previously identified candidate AONs c.151C>T AON-A (**A**), c.151C>T AON-B (**B**), c.151C>T AON-E (**C**) and c.436+368\_436+369dupAG AON-B (**D**) were investigated at two different doses. **A**) c.151C>T AON-A results in significant decrease in mutant *COCH* transcripts at 250nM, but not at 100nM. **B**) c.151C>T AON-B was able to induce a significant decrease in mutant *COCH* transcripts at both 100nM and 250nM, but no differences between the two doses were observed. **C**) c.151C>T AON-E decreased the level of mutant *COCH* transcripts in a statistically significant and dose-dependent manner. At a concentration of 250nM, the amount of *COCH* transcripts was reduced to 20% of those in cells treated with a scrambled control AON. **D**) Transfection of c.436+368\_436+369dupAG AON-B resulted in a significant decrease of mutant *COCH* transcripts, without statistically relevant differences between the two concentrations. All four AONs had a gapmer design with wings of 2'-O-methyl-RNA bases flanking the central PS-DNA core. AONs were transfected at a dose leading to the indicated concentration in the well, and investigated for their effect on transcript levels 24 hours after transfection. Data is expressed as mean  $\pm$  SD of 3 replicate transfections, normalized to the expression of RPS18 and displayed as the fold change compared to scrambled control AON-treated cells. \*  $P < 0.05$ , \*\*  $P < 0.01$ , \*\*\*  $P < 0.001$ , \*\*\*\*  $P < 0.0001$ , one-way ANOVA with Tukey's post-test.

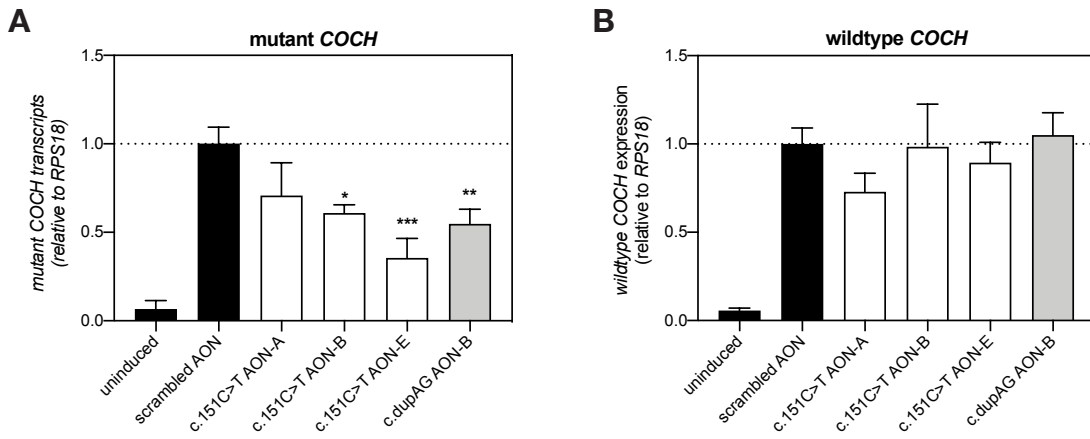

**Figure 4. Allele-specificity of the identified AONs.** AONs directed against the c.151C>T mutation or the c.436+368\_436+369dupAG (dupAG) variant were transfected in stable transgenic cell lines expressing **A)** a mutant *COCH* minigene, and **B)** a wildtype *COCH* minigene. AONs were transfected at a dose that results in a final concentration of 100nM in the culture medium, and their effect on *COCH* transcript levels was investigated 24 hours post transfection. **A)** As shown previously, c.151C>T AON-B and AON-E, and dupAG AON-B, were able to induce a significant decrease in the mutant *COCH* transcript level. **B)** None of the AONs resulted in a significant decrease in wildtype *COCH* transcript levels in transgenic cells expressing the wildtype *COCH* minigene. While c.151C>T AON-A results in a decrease in wildtype *COCH* transcript levels, the observed decrease is not statistically significant ( $P = 0.14$ , Tukey's multiple comparison test). All AONs used here consisted of a gapmer composition. Data are displayed as the fold change compared to untreated cells (mean  $\pm$  SD) of 3 replicates, and normalized for the expression *RPS18*. \*  $P < 0.05$ , \*\*  $P < 0.01$ , one-way ANOVA with Tukey's post-test.

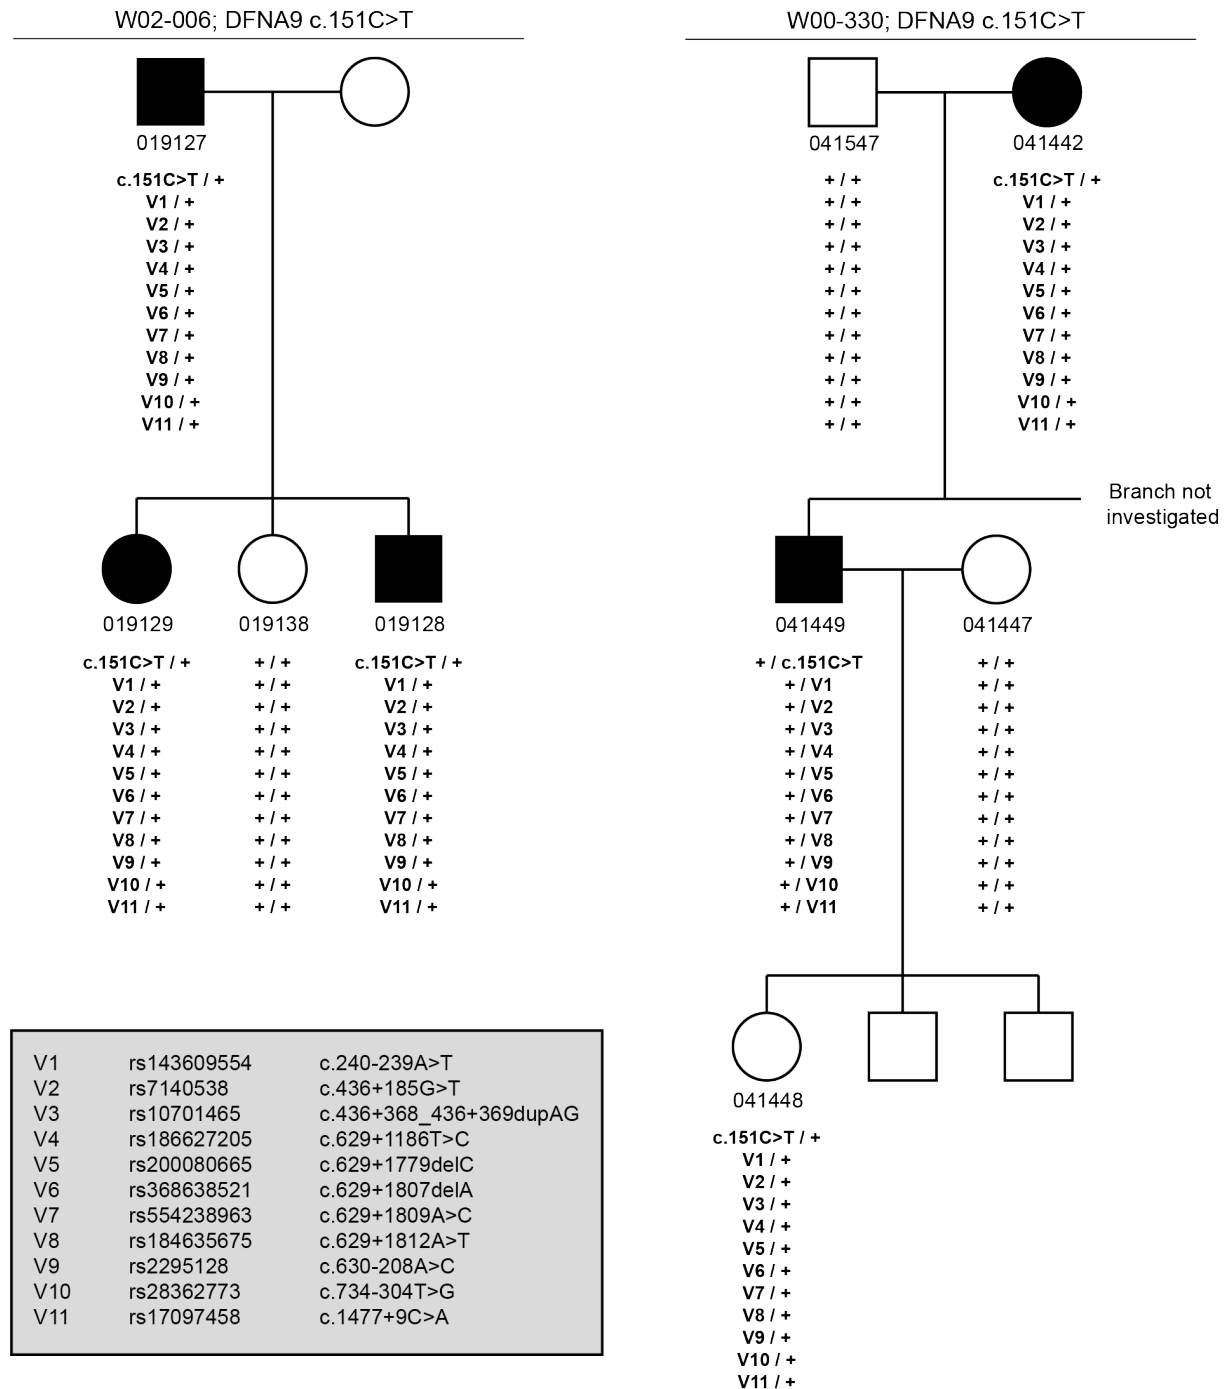

**Figure S1. Segregation analysis of haplotype-specific variants.** Small branches from the pedigrees of two large Dutch DFNA9 families (W02-006 and W00-330) were investigated to confirm co-segregation of the haplotype-specific variants with the c.151C>T mutation. Numbers below each individual depict the internal identifier of the DNA samples. Individual 041448 was not clinically affected at the time of sample collection. V1-V10: *COCH* variants (see grey box); +: wildtype; square: male; circle: female; open symbol: clinically unaffected; closed symbol: clinically affected.

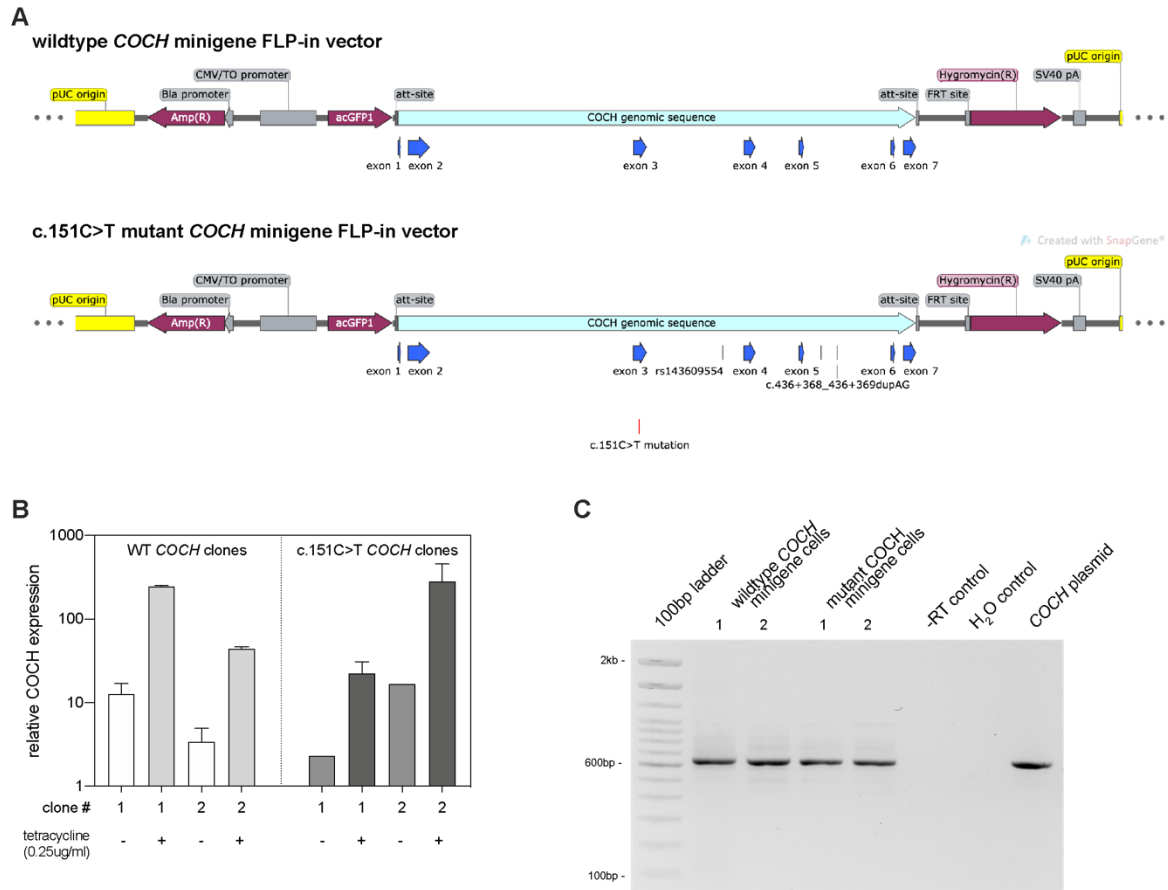

**Figure S2. Inducible *COCH* minigene T-REx 293T cells. A)** schematic overview of the wildtype and mutant *COCH* vectors that were used to establish the *COCH* minigene T-REx 293T cells. **B)** Measurement of *COCH* expression upon overnight induction with tetracycline. Two clones of wildtype *COCH* minigene-expressing transgenic cells, and two clones of mutant *COCH* minigene-expressing transgenic cells were investigated. Wildtype clone 2, and mutant clone 1 were selected for experiments based on the relatively similar levels of *COCH* expression upon tetracycline treatment. Note that uninduced cells always show a certain level of background *COCH* expression. As the Taqman™ probe for the mutant *COCH* transcript is highly specific, it appears that the transcriptional activity of the tetracycline promoter is not completely off in uninduced cells. Data shown as mean  $\pm$  SD. **C)** RT-PCR analysis of *COCH* transcripts in tetracycline-treated mutant and wildtype *COCH* minigene-expressing cells. For each cell line, two replicate samples are shown. Sanger sequencing of the amplicons confirmed correct splicing of the minigene *COCH* transcripts. The positive control is a plasmid containing the coding sequence of *COCH* that was amplified from fetal cochlear cDNA.
